# Supplementary material for: SNARE SYP132 mediates divergent traffic of plasma membrane H+-ATPase AHA1 and antimicrobial PR1 during bacterial pathogenesis
Source: PubMed Central journal article supplement (PMC9237740; doi:10.1093/plphys/kiac149), 2022-03-28
Supplement: kiac149_supplementary_data.pdf [file kiac149_supplementary_data.pdf]

## 1 Supplemental Figures

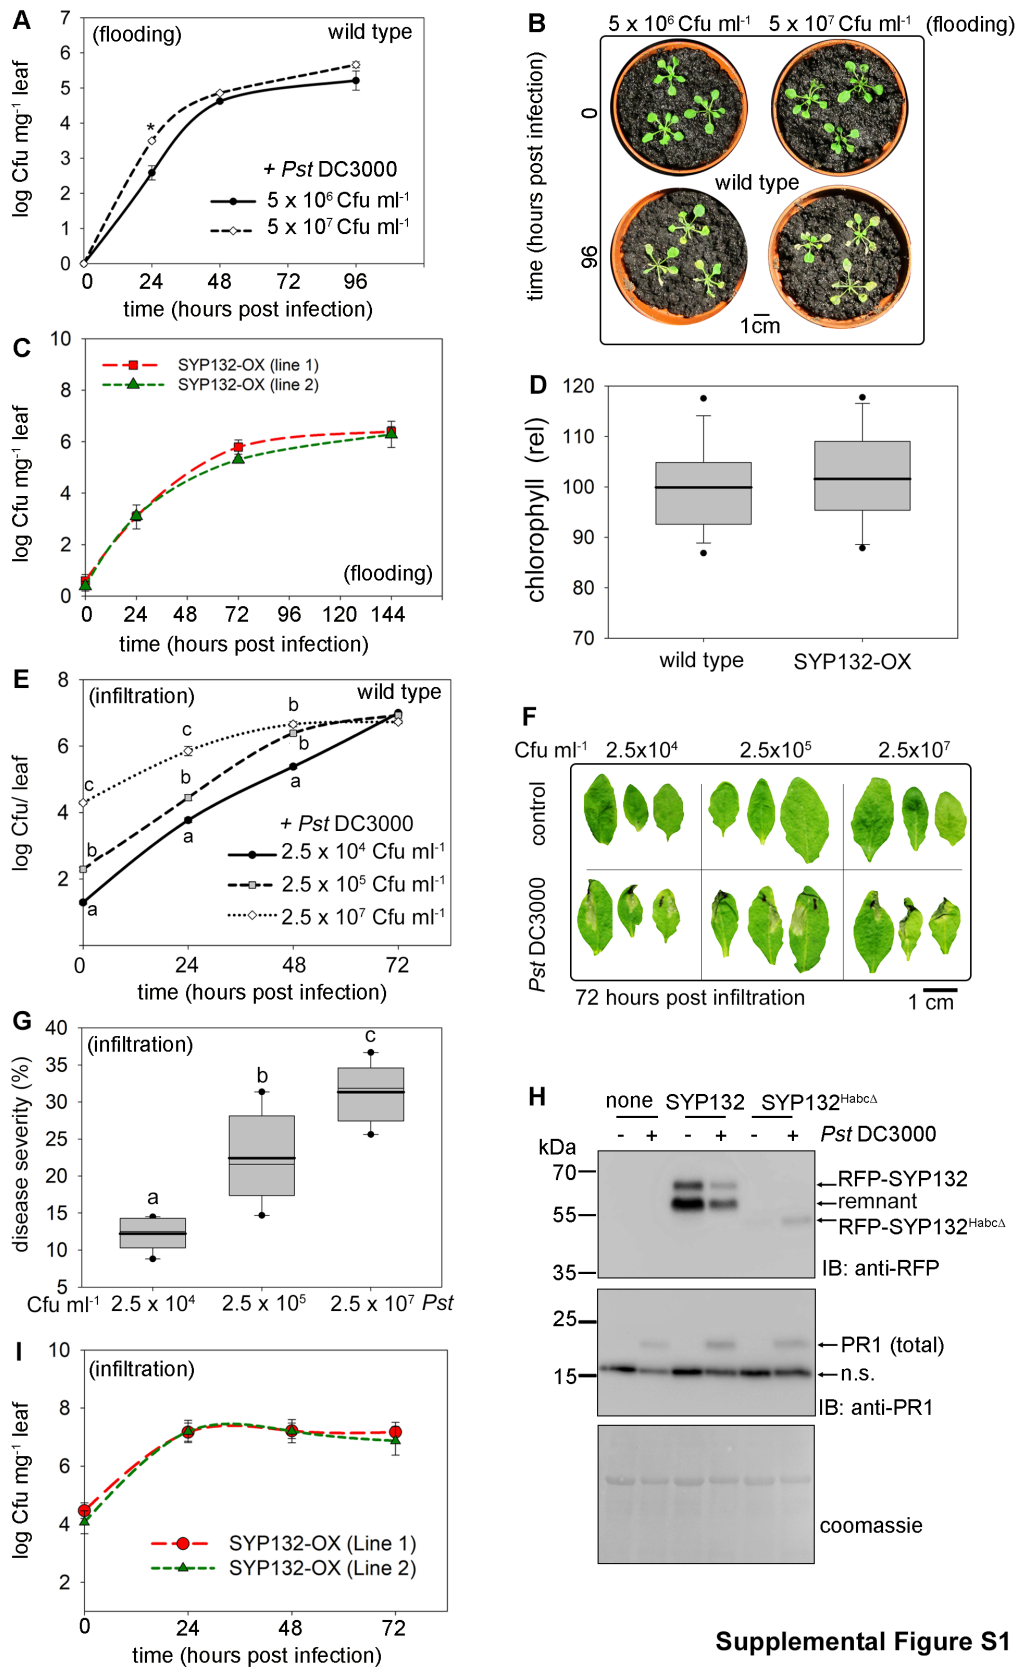

Supplemental Figure S1

2

3 Supplemental Figure S1. Bacterial proliferation in Arabidopsis is inoculum  
4 dose-dependent and evokes SYP132-dependent antimicrobial secretion.

5 (A) Bacterial pathogen proliferation in wild type *Arabidopsis* flood-inoculated using  
6 *Pseudomonas syringae* (*Pst* DC3000) inoculum at  $5 \times 10^6$  or  $5 \times 10^7$  Cfu ml<sup>-1</sup>. Bacterial  
7 population was determined in leaves sampled at 24-hour intervals and plotted as mean  
8  $\pm$  SE colony-forming units of bacteria per mg of leaf tissue (Cfu mg<sup>-1</sup>) on a logarithmic  
9 scale against time (hours post infection). Statistically significant differences assessed  
10 using Mann–Whitney–Wilcoxon test are indicated with “\*” after comparing bacterial  
11 populations for different inoculum concentrations at each timepoint. ( $P = 0.001$ ),  $N \geq$   
12 3. Data are from  $\geq 4$  plants for each time point per experiment.

13 (B) Representative photographs of wild type *Arabidopsis* seedlings flood-inoculated  
14 using *Pst* DC3000 inoculum at  $5 \times 10^6$  or  $5 \times 10^7$  Cfu ml<sup>-1</sup> and grown on soil for 96  
15 hours post infection. Images are aligned digitally for comparisons.  $N = 3$ . Scale bar =  
16 1 cm (accurate for each image).

17 (C) Mean  $\pm$  SE colony-forming units per mg of leaf tissue (Cfu mg<sup>-1</sup>) in two  
18 independently transformed pCaMV 35S: RFP-SYP132 *Arabidopsis* over-expressing  
19 SYP132 [SYP132-OX: Line1 and Line 2], flood-inoculated with *Pst* DC3000 inoculum  
20 at  $5 \times 10^7$  Cfu ml<sup>-1</sup>. Bacterial population was determined in leaves sampled at 24-hour  
21 intervals and plotted as mean  $\pm$  SE colony-forming units of bacteria per mg of leaf  
22 tissue (Cfu mg<sup>-1</sup>) on a logarithmic scale against time (hours post infection). Bacterial  
23 populations for different *Arabidopsis* lines were compared for each timepoint.  
24 Statistically significant differences were assessed using Mann–Whitney–Wilcoxon test  
25 ( $P < 0.001$ ),  $N \geq 3$ . Data are from  $\geq 4$  plants for each time point per experiment.

26 (D) Box plots with error bars depicting chlorophyll pigments in wild type and SYP132-  
27 OX *Arabidopsis* leaf tissue, calculated relative wild type. Thin horizontal lines  
28 represent the median, bold horizontal lines represent the mean, box limits show the  
29 25<sup>th</sup> and 75<sup>th</sup> percentiles. Outliers that exceed their whisker range (1.5x interquartile  
30 range) are represented by dots. Statistically significant differences assessed using  
31 Mann–Whitney–Wilcoxon test are indicated with “\*” ( $P < 0.001$ ),  $N = 3$ , using  $\geq 6$  plants  
32 per experiment. Note: horizontal lines for mean and median are overlapped.

33 (E) Bacteria *Pst* DC3000 multiplication in wild type *Arabidopsis* leaves following  
34 infiltration with 10  $\mu$ l *Pst* DC3000 inoculum at  $2.5 \times 10^4$ ,  $2.5 \times 10^5$  or  $2.5 \times 10^7$  Cfu ml<sup>-1</sup>  
35 in buffer measured at 24-hour intervals for 72 hours post infection. Graphs are mean  
36  $\pm$  SE *Pst* DC3000 colony-forming units (Cfu) per leaf plotted are plotted on a  
37 logarithmic scale against time (hours post-infection). Letters indicate statistically

38 significant differences assessed using Kruskal-Wallis test for each time point ( $P <$   
39 0.001),  $N \geq 3$ . Data are from  $\geq 4$  plants for each time point per experiment.

40 (F) Photographs of wild type *Arabidopsis* infiltrated with 10  $\mu$ l *Pst* DC3000 inoculum at  
41  $2.5 \times 10^4$ ,  $2.5 \times 10^5$  or  $2.5 \times 10^7$  Cfu ml<sup>-1</sup> or buffer (10 mM MgCl<sub>2</sub>, control) after 72  
42 hours. Images are aligned digitally for comparisons.  $N = 3$ . Scale bar = 1 cm (accurate  
43 for each image).

44 (G) Box plot with error bars depicting % disease severity in wild type *Arabidopsis*  
45 infiltrated with 10  $\mu$ l *Pst* DC3000 inoculum at  $2.5 \times 10^4$ ,  $2.5 \times 10^5$  or  $2.5 \times 10^7$  Cfu ml<sup>-1</sup>.  
46 Area of leaf showing necrosis was measured from leaf photographs acquired 72 hours  
47 post infiltration. Thin horizontal lines represent the median, bold horizontal lines  
48 represent the mean, box limits show the 25<sup>th</sup> and 75<sup>th</sup> percentiles. Outliers that exceed  
49 their whisker range (1.5x interquartile range) are represented by dots. Letters indicate  
50 statistical significance using ANOVA ( $P < 0.01$ ),  $N = 3$ . Data are from  $\geq 4$  plants for  
51 each time point per experiment.

52 (H) Immunoblots (representative) of *Nicotiana benthamiana* leaf tissue, untransformed  
53 (none) or expressing full length SYP132 (SYP132) or dominant negative, the so-called  
54 Sp3-fragment (SYP132<sup>Habc $\Delta$</sup> ), treated with buffer (control, -) or *Pst* DC3000 (+) for 48  
55 hours. Blots show RFP-SYP132 at approx. 61 kDa or RFP-SYP132<sup>Habc $\Delta$</sup>  at approx.  
56 49 kDa using RFP antibodies (top panel) and total *Nicotiana benthamiana* PR1 at  
57 approx. 20 kDa using anti-PR1 antibody (middle panel). Coomassie stained  
58 membrane (bottom panel, pseudo coloured) represents total protein per lane. Black  
59 lines (left) indicate position of molecular mass markers, and black arrows (right)  
60 indicate expected band positions. Additional lower molecular weight bands detected  
61 in anti-RFP immunoblots (indicated as remnant) could include cleaved or part-  
62 synthesised proteins following transformations.

63 (I) *Pst* DC3000 population in two independently transformed pCaMV 35S: RFP-  
64 SYP132 *Arabidopsis* lines over-expressing SYP132 (SYP132-OX: Line1 and Line2)  
65 following infiltration with *Pst* DC3000 inoculum at  $2.5 \times 10^5$  Cfu ml<sup>-1</sup>. Graphs are mean  
66  $\pm$  SE *Pst* DC3000 colony-forming units (Cfu) per leaf plotted on a logarithmic scale  
67 against time (hours) post infection. Statistically significant differences were assessed  
68 using Mann–Whitney–Wilcoxon test after comparing bacterial populations for different  
69 *Arabidopsis* lines at each timepoint ( $P < 0.001$ ),  $N = 3$ . Data are from  $\geq 4$  plants for  
70 each time point per experiment.

71

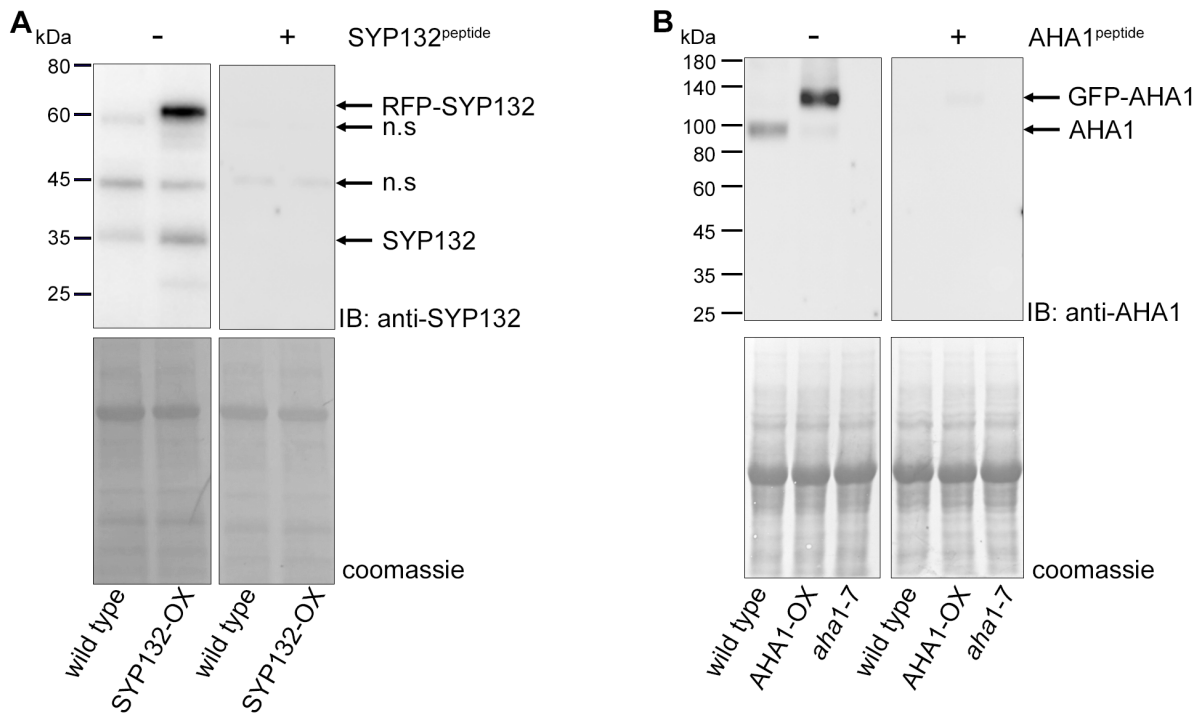72 **Supplemental Figure S2**73 **Supplemental Figure S2. Verification of custom synthesized anti-SYP132 and**  
74 **anti-AHA1 antibodies.**

75 Immunoblot analysis to determine specificity of custom-synthesised antibodies.  
76 Proteins from *Arabidopsis thaliana* leaf lysates were resolved on SDS-PAGE and  
77 treated with the custom synthesised antibodies incubated without (-) or with (+) the  
78 protein specific peptides with the expectation that protein-specific bands would not be  
79 detected if the antibody was saturated with the antigen prior to immunoblot. Blotted  
80 membranes were stained with Coomassie blue (lower panels) show total protein per  
81 lane. Black lines (left) indicate positions of molecular mass markers, and black arrows  
82 (right) indicate expected band positions. In each case, protein-specific bands were  
83 observed in lysates from wild type and over-expressor plants, but these bands were  
84 absent in mutant plants or if antibodies were saturated with antigen peptides prior to  
85 immunoblot.

86 (A) Immunoblot verifying anti-SYP132 antibodies using leaf lysates from wild type and  
87 pCaMV 35S: RFP-SYP132 *Arabidopsis* over-expressing SYP132 (SYP132-OX)  
88 *Arabidopsis* (Xia et al., 2019). Bands for native SYP132 at approx. 35 kDa and RFP-  
89 SYP132 at approx. 61 kDa were detected in the immunoblot analysis. Note: Non-  
90 specific (n.s.) bands detected are indicated.

91 (B) Immunoblot to test anti-AHA1 antibodies using leaf lysates from wild type, AHA1  
92 over-expressor pCaMV 35S: GFP-AHA1 (AHA1-OX) and the *aha1* mutant (*aha1-7*)  
93 (Haruta and Sussman, 2012) Arabidopsis. Bands for native AHA1 at approx. 100 kDa  
94 and for GFP-tagged AHA1 at approx. 130 kDa were detected in the immunoblot  
95 analysis.

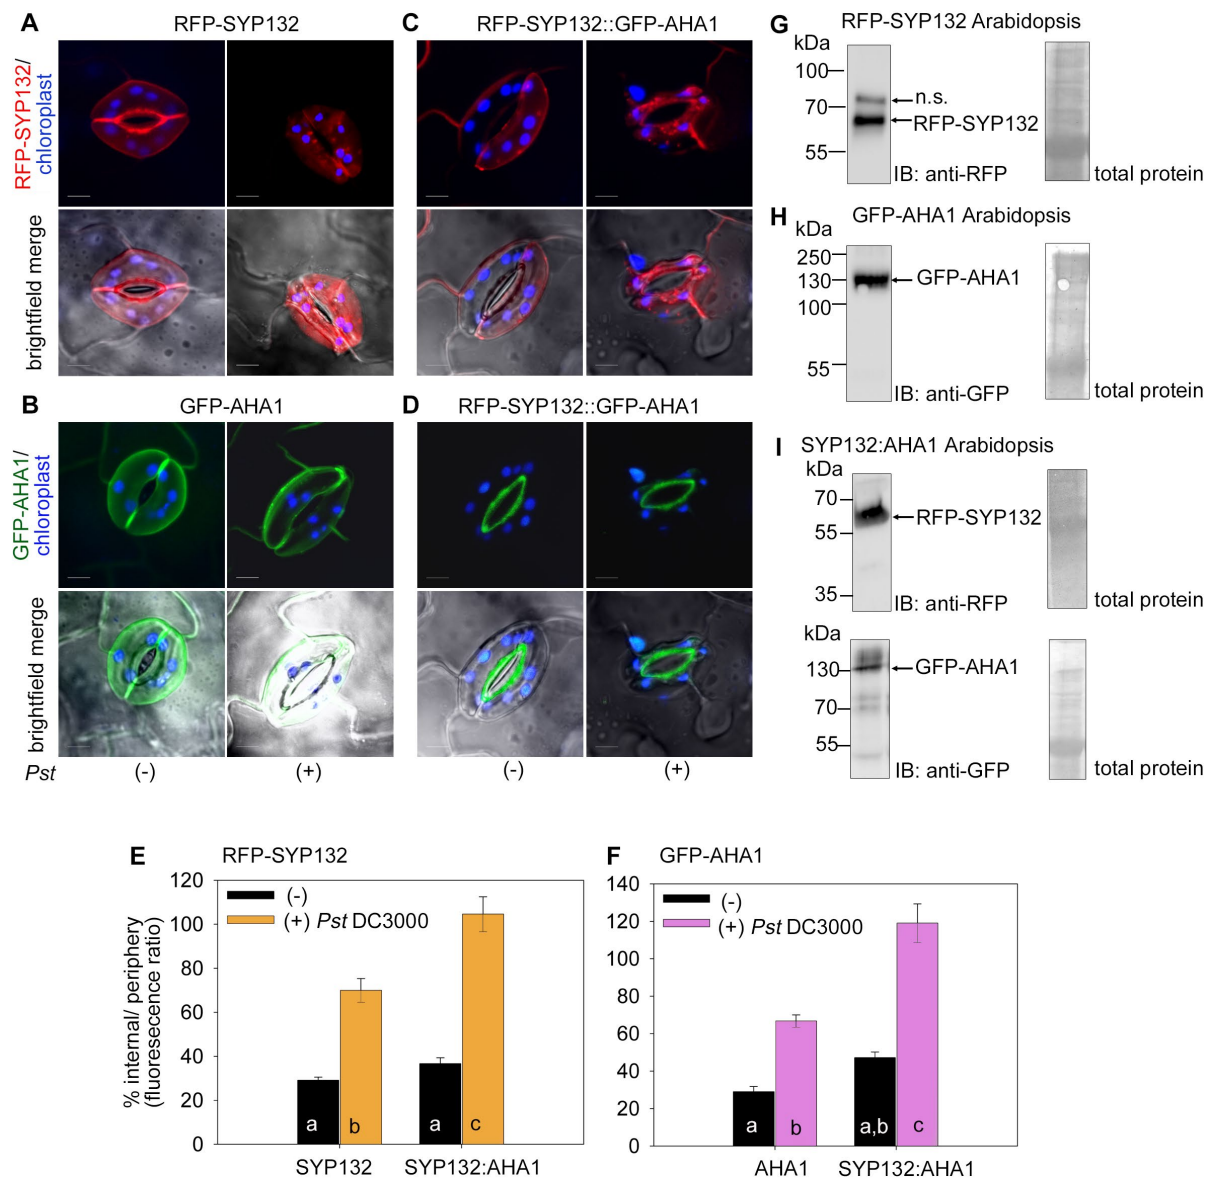

### Supplemental Figure 3

96

### Supplemental Figure S3. Co-ordinate redistribution of AHA1 and SYP132 from the cell periphery is enhanced in response to bacterial infection.

98

99 Distribution of fluorophore tagged-SYP132 and AHA1 in stomatal guard cells in four-  
 100 week-old transgenic Arabidopsis infiltrated with buffer (10 mM MgCl<sub>2</sub>, control, left  
 101 panels) without (-) or with *Pst* DC3000 (+) inoculum at 2.5 x 10<sup>5</sup> Cfu ml<sup>-1</sup> (right panels).  
 102 Confocal images were acquired as Z-stacks and rendered as 3D projections 48 hours  
 103 post-infection. Scale bar = 5 μm. Stomata for imaging were chosen at random, from  
 104 two different plants for each treatment per experiment.

105 (A) Representative confocal images from pCaMV 35S: RFP-SYP132 Arabidopsis  
 106 over-expressing RFP-SYP132 (SYP132-OX) detecting RFP-SYP132 (red) and

107 chloroplast (blue) fluorescence without (top panels) and with bright field overlay  
108 (bottom panels).

109 (B) Representative confocal images from pCaMV 35S: GFP-AHA1 Arabidopsis over-  
110 expressing GFP-AHA1, detecting GFP-AHA1 (green) and chloroplast (blue)  
111 fluorescence without (top panels) and with (bottom panels) bright field overlay.

112 (C-D) Representative confocal images from pCaMV 35S: RFP-SYP132:GFP-AHA1  
113 plants co-expressing RFP-SYP132 and GFP-AHA1, detecting (C) RFP-SYP132 (red)  
114 / chloroplast (blue) fluorescence without (top panels) and with bright field overlay  
115 (bottom panels), and detecting (D) GFP-AHA1 (green) / chloroplast (blue)  
116 fluorescence without (top panels) and with bright field overlay (bottom panels).

117 (E-F) Graphs showing mean  $\pm$  SE internal / periphery fluorescence ratios following  
118 background subtraction, in each guard cell for RFP-SYP132 (E) and GFP-AHA1 (F)  
119 from  $\geq 12$  stomata. The region of the cell periphery, 0.5  $\mu\text{m}$  in width, and the cell  
120 interior were traced for each guard cell using the bright-field image as a reference.  
121 Integrated fluorescence density within the ROIs was measured and corrected for  
122 background fluorescence (see "Materials and Methods"). Letters indicate statistically  
123 significant differences determined using ANOVA ( $P < 0.001$ ),  $N = 3$ . Data are acquired  
124 from  $\geq 18$  guard cells.

125 (G) Immunoblots (left panel), representative, using anti-RFP antibody detecting  
126 expression of RFP-SYP132 at approx. 61 kDa. Note, that a non-specific (n.s.) at  
127 approx. 80 kDa was observed.

128 (H) Immunoblots (left panel), representative, using anti-GFP antibody detecting  
129 expression of GFP-AHA1 at approx. 130 kDa.

130 (I) Immunoblots, representative, detecting expression of RFP-SYP132 at approx. 61  
131 kDa) using anti-RFP antibody (top panels), and GFP-AHA1 at approx. 130 kDa using  
132 anti-GFP antibody (bottom panels).

133 Black lines (left) indicate positions of molecular mass markers, and black arrows (right)  
134 indicate expected band positions. Blotted membrane stained with Coomassie blue  
135 (right panels) show total protein per lane (G-I).

136

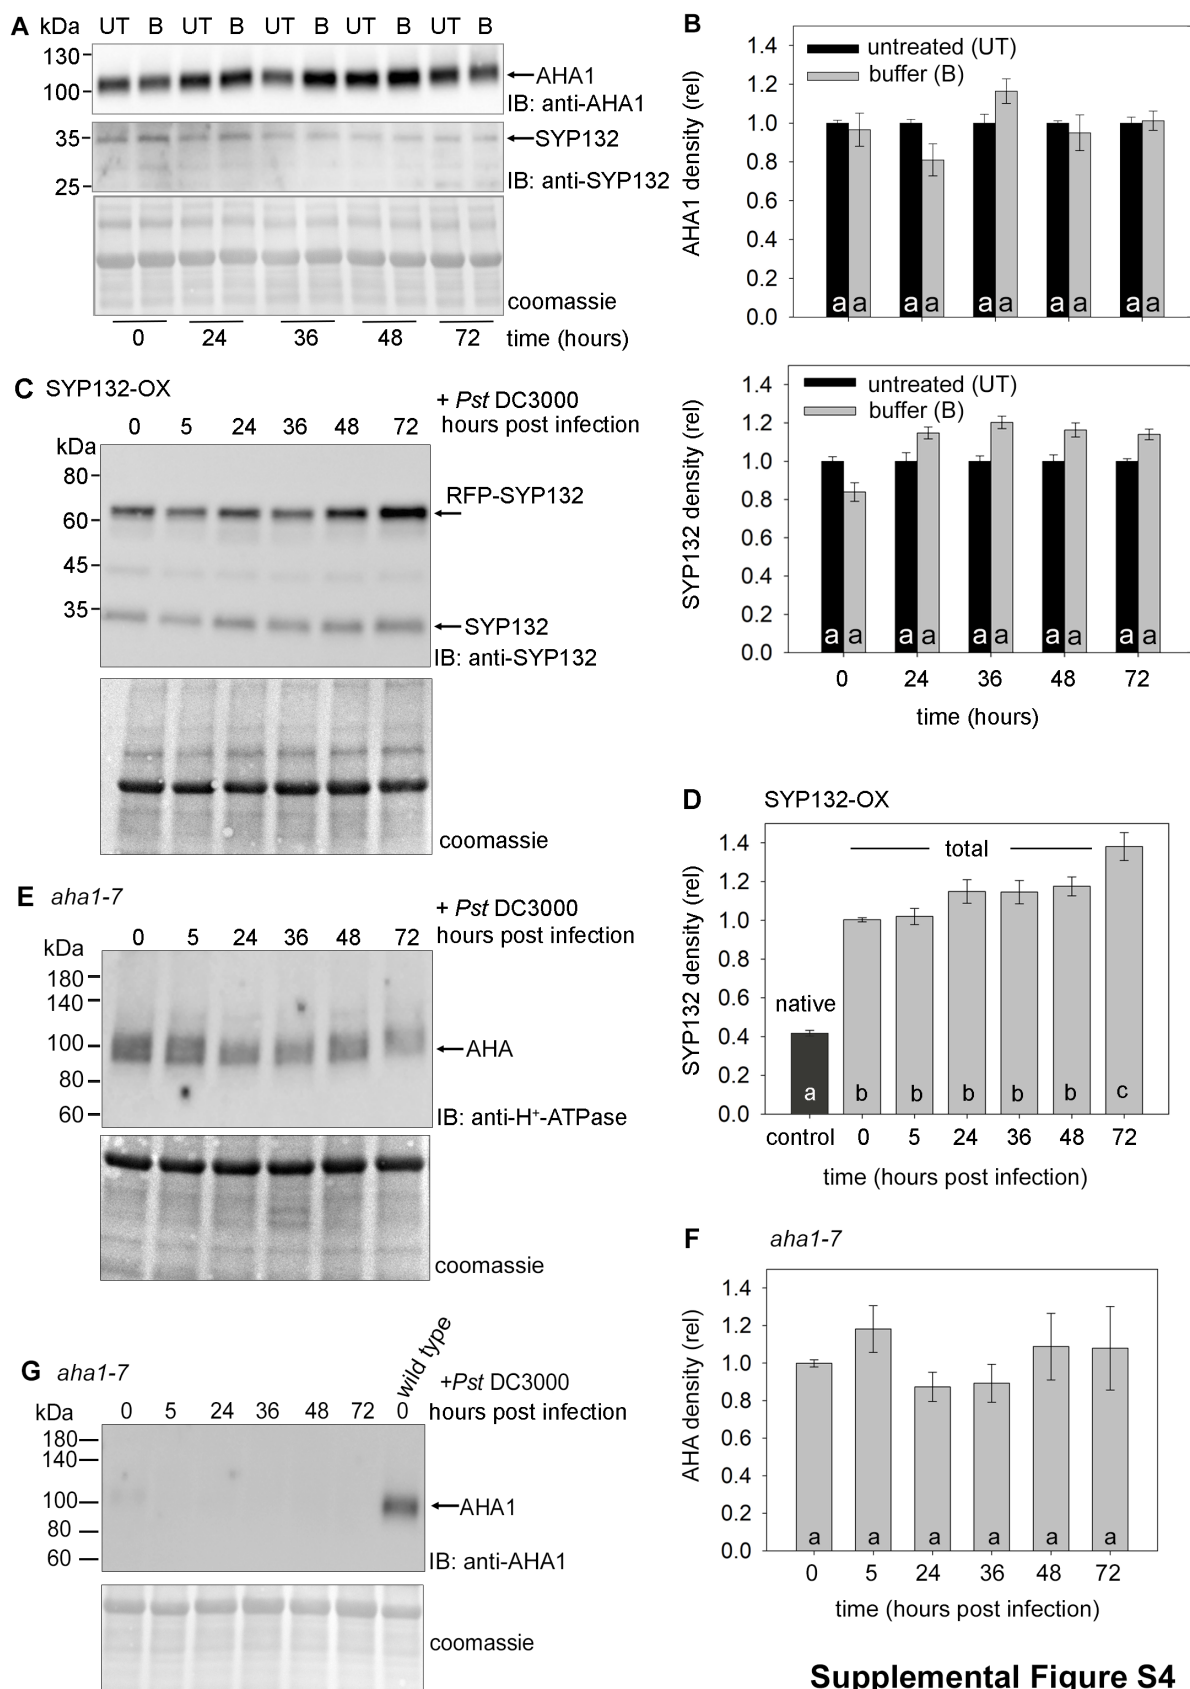

Supplemental Figure S4

## Supplemental Figure S4. Verifying SYP132 and AHA1 protein expression.

137  
 138  
 139 (A) Immunoblots of microsomal membranes from wild type Arabidopsis untreated (UT)  
 140 or mock-infiltrated with 10  $\mu$ l 10 mM MgCl<sub>2</sub> buffer (B) sampled at 24-hour intervals up



141 to 72 hours. Native AHA1 (top panel) at approx. 100 kDa was detected using anti-  
142 AHA1 antibody. Native SYP132 (middle panel) at approx. 35 kDa was detected using  
143 anti-SYP132 antibodies. Coomassie stained membrane (bottom panel) shows total  
144 protein loaded per lane.

145 (B) Graphs showing mean  $\pm$  SE protein levels for AHA1 (top panel) and SYP132  
146 (bottom panel) quantified using densitometric analysis of immunoblot bands in the  
147 ImageJ software. Band densities were normalized to total protein per lane detected  
148 using Coomassie stain and plotted as relative to time zero. Letters denote statistically  
149 significant differences assessed using ANOVA ( $P < 0.001$ ),  $N = 3$ .

150 (C,E,G) Representative immunoblots of microsomes purified from Arabidopsis leaf  
151 tissue harvested at 24-hour intervals for 72 hours post infection with *Pseudomonas*  
152 *syringae* (*Pst* DC3000) and resolved on SDS-PAGE are shown (top panels). In pCaMV  
153 35S: RFP-SYP132 Arabidopsis over-expressing SYP132 (SYP132-OX) both native  
154 SYP132 at approx. 35 kDa and RFP-SYP132 at approx. 61 kDa are detected using  
155 anti-SYP132 antibodies (C), in Arabidopsis *aha1-7* mutant total AHA population is  
156 detected using anti-H<sup>+</sup>-ATPase antibodies which detect all AHA isoforms (E), while  
157 AHA1 is detected using anti-AHA1 antibodies (G), at approx. 100 kDa. AHA1 bands  
158 are detected in wild type Arabidopsis but absent in *aha1-7* mutant plants.  $N = 3$ , with  
159  $n \geq 4$  plants per time point in each experiment. Coomassie stained membranes  
160 (bottom) panels show total protein per lane. Note: Coomassie images in (C) and (E)  
161 correspond with Figures 3 (H) and (J) respectively, and therefore are the same.

162 (D, F) Protein levels for SYP132 (D) and AHA (F) in SYP132-OX and *aha1-7* mutant  
163 Arabidopsis respectively at different times post infection. Data are means  $\pm$  SE protein  
164 levels, derived from densitometry of immunoblot bands using ImageJ software,  
165 normalized to total protein per lane detected using Coomassie stain. SYP132 density  
166 in SYP132-OX plants (D) shows native SNARE levels at time zero (black bar) and total  
167 SYP132 levels (native SYP132 + RFP-SYP132, grey bars) relative to time zero at  
168 different time intervals post infection. Letters denote statistically significant differences  
169 assessed using ANOVA ( $P < 0.001$ ),  $N = 3$ .

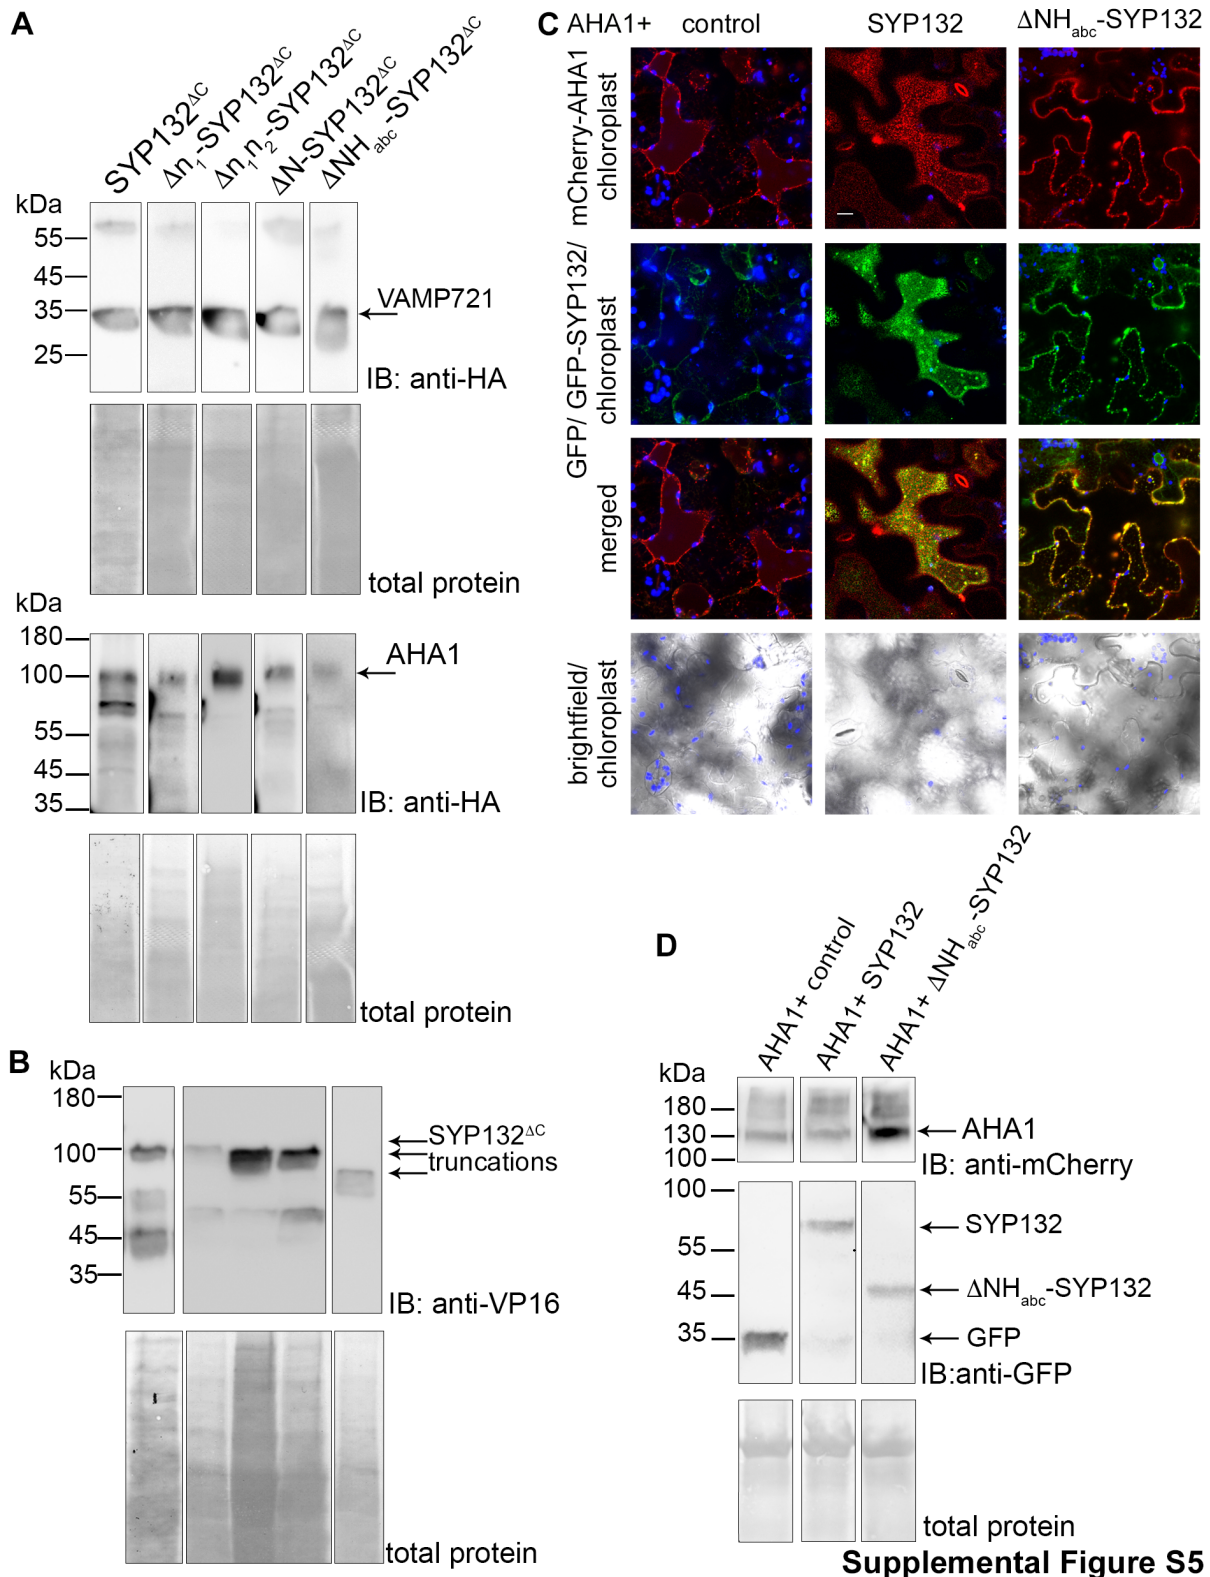

170

171 **Supplemental Figure S5. Verifying SYP132 and AHA1 protein expression and**  
 172 **cellular distribution.**

173 (A-B) Representative immunoblots detecting expression of proteins in haploid yeast  
 174 used in GPS assay in (Figure 6A) resolved on SDS-PAGE to detect the expression of  
 175 NubG-fused prey (A) and CubPLV fused Exg2-bait (B) proteins using anti-HA and anti-

176 VP16 antibodies respectively. Immunoblots detecting expression of prey proteins,  
177 VAMP721 at approx. 32 kDa and AHA1 at approx. 119 kDa, and bait proteins  
178 SYP132<sup>ΔC</sup> (M1-Q270) at approx. 91 kDa, Δn<sub>1</sub>-SYP132<sup>ΔC</sup> (R13-Q270) at approx. 89 kDa, Δn<sub>1</sub>n<sub>2</sub>-  
179 SYP132<sup>ΔC</sup> (E23-Q270) at approx. 88 kDa, ΔN-SYP132<sup>ΔC</sup> (G30-Q270) at approx. 87 kDa and  
180 ΔNH<sub>abc</sub>-SYP132<sup>ΔC</sup> (E185-Q270) at approx. 70 kDa. Black lines (left) indicate positions of  
181 molecular mass markers, and black arrows (right) indicate expected band positions.

182 (C) Confocal images of *Nicotiana tabacum* tobacco epidermis transiently transformed  
183 with the bicistronic pFRETgc-2in1-NN vector to co-express mCherry-fused AHA1 with  
184 GFP on its own (control), with GFP-fused full-length SYP132 or the ΔNH<sub>abc</sub>-SYP132,  
185 for analysis of their periphery/ internal cellular distribution (see Figure 6C). Images  
186 (representative) are 3D projections of z-stacks collected following plasmolysis with  
187 chlorophyll overlay (blue), showing (top to bottom), mCherry-AHA (red), GFP or GFP-  
188 SNARE (green) and brightfield. GFP on its own can be constitutively secreted and  
189 acidity of apoplast quenches signal resulting in reduced fluorescence observed in  
190 confocal images. Scale bar = 20μm. N = 3.

191 (D) Representative immunoblots, verifying expression of the mCherry-AHA1 (top  
192 panel) and GFP-SYP132 (middle panel) in *Nicotiana tabacum* (C, and Figure 6B).  
193 Immunoblot analysis used anti-mCherry antibodies to detect mCherry-AHA1 at  
194 approx. 133 kDa, and anti-GFP antibodies to detect GFP (control), GFP-SYP132 at  
195 approx. 64 kDa and GFP-ΔNH<sub>abc</sub>-SYP132 at approx. 42 kDa. Total protein in each  
196 lane was detected using ponceau stain on immunoblot membrane (bottom panel).

197

198 **REFERENCES**

199

200 **Haruta M, Sussman MR** (2012) The effect of a genetically reduced plasma  
201 membrane protonmotive force on vegetative growth of *Arabidopsis thaliana*  
202 *Plant Physiology* doi:10.1104/pp.111.189167

203 **Xia L, Mar Marques-Bueno M, Bruce CG, Karnik R** (2019) Unusual Roles of  
204 Secretory SNARE SYP132 in Plasma Membrane H(+)-ATPase Traffic and  
205 Vegetative Plant Growth. *Plant Physiol* **180**: 837-858

206
